# Supplementary material
Source: publisher site journal article supplement (https://www.spandidos-publications.com/7245/downloadSupplementary)
Supplement: Supplementary file 1 [file downloadSupplementary]

Table SI. Predicted targets of action of active components of purslane.

| Targets of action | Active components | Probability |
|-------------------|-------------------|-------------|
| CYP1B1            | Hesperetin        | 0.601       |
| CA7               | Hesperetin        | 0.364       |
| CA12              | Hesperetin        | 0.364       |
| CA4               | Hesperetin        | 0.364       |
| CYP19A1           | Hesperetin        | 0.254       |
| ESR1              | Hesperetin        | 0.167       |
| ESR2              | Hesperetin        | 0.167       |
| HSD17B1           | Hesperetin        | 0.159       |
| MAOB              | Hesperetin        | 0.143       |
| MMP13             | Hesperetin        | 0.143       |
| ADORA1            | Hesperetin        | 0.135       |
| ABCG2             | Hesperetin        | 0.127       |
| TAS2R31           | Hesperetin        | 0.127       |
| ADORA3            | Hesperetin        | 0.127       |
| MMP12             | Hesperetin        | 0.127       |
| PTGS1             | Hesperetin        | 0.119       |
| ABCC1             | Hesperetin        | 0.112       |
| SHBG              | Hesperetin        | 0.112       |
| CBR1              | Hesperetin        | 0.112       |
| AKR1C3            | Hesperetin        | 0.112       |
| PLA2G1B           | Hesperetin        | 0.112       |
| KLK1              | Hesperetin        | 0.112       |
| KLK2              | Hesperetin        | 0.112       |
| PPARG             | Hesperetin        | 0.112       |
| CA3               | Hesperetin        | 0.112       |
| ABCB1             | Hesperetin        | 0.112       |
| SRC               | Hesperetin        | 0.112       |
| GRM5              | Hesperetin        | 0.112       |
| TERT              | Hesperetin        | 0.112       |
| CA2               | Hesperetin        | 0.112       |
| CA1               | Hesperetin        | 0.112       |
| KDR               | Hesperetin        | 0.112       |
| POLB              | Hesperetin        | 0.112       |
| PLA2G5            | Hesperetin        | 0.112       |
| PLA2G10           | Hesperetin        | 0.112       |
| GSK3B             | Hesperetin        | 0.112       |
| CHRNA7            | Hesperetin        | 0.112       |
| CES1              | Hesperetin        | 0.112       |
| MET               | Hesperetin        | 0.112       |
| ACHE              | Hesperetin        | 0.112       |
| TOP1              | Hesperetin        | 0.112       |
| CA6               | Hesperetin        | 0.112       |
| CA5A              | Hesperetin        | 0.112       |
| IGF1R             | Hesperetin        | 0.112       |
| PIM1              | Hesperetin        | 0.112       |
| PIM2              | Hesperetin        | 0.112       |

|          |                  |       |
|----------|------------------|-------|
| PIM3     | Hesperetin       | 0.112 |
| BACE1    | Hesperetin       | 0.112 |
| MMP2     | Hesperetin       | 0.112 |
| RXRA     | Hesperetin       | 0.112 |
| SERPINE1 | Hesperetin       | 0.112 |
| ADCY5    | Hesperetin       | 0.112 |
| DYRK1A   | Hesperetin       | 0.112 |
| APP      | Hesperetin       | 0.112 |
| GRM2     | Hesperetin       | 0.112 |
| MMP9     | Hesperetin       | 0.112 |
| GUSB     | Hesperetin       | 0.112 |
| CA9      | Hesperetin       | 0.112 |
| MYLK     | Hesperetin       | 0.112 |
| DNMT1    | Hesperetin       | 0.112 |
| KCNH2    | Hesperetin       | 0.112 |
| PGD      | Hesperetin       | 0.112 |
| ST3GAL3  | Hesperetin       | 0.112 |
| FUT7     | Hesperetin       | 0.112 |
| FUT4     | Hesperetin       | 0.112 |
| STAT1    | Hesperetin       | 0.112 |
| SQLE     | Hesperetin       | 0.112 |
| AKR1B1   | Hesperetin       | 0.112 |
| FFAR1    | Hesperetin       | 0.112 |
| CES2     | Hesperetin       | 0.112 |
| MMP14    | Hesperetin       | 0.112 |
| PDGFRB   | Hesperetin       | 0.112 |
| PARP1    | Hesperetin       | 0.112 |
| TNKS2    | Hesperetin       | 0.112 |
| TNKS     | Hesperetin       | 0.112 |
| ODC1     | Hesperetin       | 0.112 |
| TDP1     | Hesperetin       | 0.112 |
| ERN1     | Hesperetin       | 0.112 |
| BCL2     | Hesperetin       | 0.112 |
| MMP3     | Hesperetin       | 0.112 |
| CLK1     | Hesperetin       | 0.112 |
| DYRK1B   | Hesperetin       | 0.112 |
| KCNMA1   | Hesperetin       | 0.112 |
| NAT1     | Hesperetin       | 0.112 |
| CA13     | Hesperetin       | 0.112 |
| CHEK1    | Hesperetin       | 0.112 |
| FASN     | Hesperetin       | 0.112 |
| EDNRA    | Hesperetin       | 0.112 |
| SGK1     | Hesperetin       | 0.112 |
| HSD17B2  | Hesperetin       | 0.112 |
| MAOA     | Hesperetin       | 0.112 |
| RPS6KA5  | Hesperetin       | 0.112 |
| FABP4    | Arachidonic acid | 1.000 |
| PPARA    | Arachidonic acid | 1.000 |
| PPARD    | Arachidonic acid | 1.000 |

|          |                  |       |
|----------|------------------|-------|
| FABP3    | Arachidonic acid | 0.254 |
| ALOX5    | Arachidonic acid | 0.238 |
| CNR1     | Arachidonic acid | 0.135 |
| FAAH     | Arachidonic acid | 0.119 |
| FABP5    | Arachidonic acid | 0.119 |
| FABP1    | Arachidonic acid | 0.119 |
| SCD      | Arachidonic acid | 0.119 |
| PTGER2   | Arachidonic acid | 0.119 |
| TRPV1    | Arachidonic acid | 0.112 |
| PTGER1   | Arachidonic acid | 0.112 |
| PTGES    | Arachidonic acid | 0.112 |
| ALOX12   | Arachidonic acid | 0.112 |
| PTPN1    | Arachidonic acid | 0.112 |
| PTGES2   | Arachidonic acid | 0.112 |
| RXRB     | Arachidonic acid | 0.112 |
| RXRG     | Arachidonic acid | 0.112 |
| RARG     | Arachidonic acid | 0.112 |
| RARB     | Arachidonic acid | 0.112 |
| RARA     | Arachidonic acid | 0.112 |
| PTGDR2   | Arachidonic acid | 0.112 |
| PTPN2    | Arachidonic acid | 0.112 |
| ALOX15   | Arachidonic acid | 0.112 |
| FABP2    | Arachidonic acid | 0.112 |
| TBXAS1   | Arachidonic acid | 0.112 |
| CYP26B1  | Arachidonic acid | 0.112 |
| PLA2G4A  | Arachidonic acid | 0.112 |
| HSD11B1  | Arachidonic acid | 0.112 |
| TRPA1    | Arachidonic acid | 0.112 |
| CYP26A1  | Arachidonic acid | 0.112 |
| PTGDR    | Arachidonic acid | 0.112 |
| HMGCR    | Arachidonic acid | 0.112 |
| MDM2     | Arachidonic acid | 0.112 |
| HSD11B2  | Arachidonic acid | 0.112 |
| TRPM8    | Arachidonic acid | 0.112 |
| PTGER4   | Arachidonic acid | 0.112 |
| DAGLA    | Arachidonic acid | 0.112 |
| LTB4R    | Arachidonic acid | 0.112 |
| CDC25A   | Arachidonic acid | 0.112 |
| PSEN2    | Arachidonic acid | 0.112 |
| SLC22A12 | Arachidonic acid | 0.112 |
| PTGIR    | Arachidonic acid | 0.112 |
| PRKCH    | Arachidonic acid | 0.112 |
| NR1H3    | Arachidonic acid | 0.112 |
| RORC     | Arachidonic acid | 0.112 |
| CNR2     | Arachidonic acid | 0.112 |
| AGTR1    | Arachidonic acid | 0.112 |
| SLC16A1  | Arachidonic acid | 0.112 |
| MMP8     | Arachidonic acid | 0.112 |
| PTPN11   | Arachidonic acid | 0.112 |

|          |                  |       |
|----------|------------------|-------|
| HNF4A    | Arachidonic acid | 0.112 |
| RBP4     | Arachidonic acid | 0.112 |
| ENPP2    | Arachidonic acid | 0.112 |
| TP53     | Arachidonic acid | 0.112 |
| NOS2     | Arachidonic acid | 0.112 |
| NR3C1    | Arachidonic acid | 0.112 |
| CMA1     | Arachidonic acid | 0.112 |
| CTSG     | Arachidonic acid | 0.112 |
| HTR2B    | Arachidonic acid | 0.112 |
| RORB     | Arachidonic acid | 0.112 |
| MAPK1    | Arachidonic acid | 0.112 |
| OXER1    | Arachidonic acid | 0.112 |
| ITGAL    | Arachidonic acid | 0.112 |
| CCKAR    | Arachidonic acid | 0.112 |
| PGR      | Arachidonic acid | 0.112 |
| ADRA2B   | Arachidonic acid | 0.112 |
| MAPK14   | Arachidonic acid | 0.112 |
| FFAR4    | Arachidonic acid | 0.112 |
| CDC25B   | Arachidonic acid | 0.112 |
| PTGS2    | Arachidonic acid | 0.112 |
| PTPN6    | Arachidonic acid | 0.112 |
| ALOX5AP  | Arachidonic acid | 0.112 |
| PDE4D    | Arachidonic acid | 0.112 |
| PDE4A    | Arachidonic acid | 0.112 |
| PDE4B    | Arachidonic acid | 0.112 |
| PDE4C    | Arachidonic acid | 0.112 |
| ACE      | Arachidonic acid | 0.112 |
| KEAP1    | Arachidonic acid | 0.112 |
| PRKAG1   | Arachidonic acid | 0.112 |
| FNTB     | Arachidonic acid | 0.112 |
| NR3C2    | Arachidonic acid | 0.112 |
| AKR1B10  | Arachidonic acid | 0.112 |
| NPC1L1   | □-sitosterol     | 0.876 |
| CYP17A1  | □-sitosterol     | 0.389 |
| SREBF2   | □-sitosterol     | 0.323 |
| AR       | □-sitosterol     | 0.256 |
| CYP51A1  | □-sitosterol     | 0.256 |
| RORA     | □-sitosterol     | 0.181 |
| CYP2C19  | □-sitosterol     | 0.131 |
| SERPINA6 | □-sitosterol     | 0.114 |
| G6PD     | □-sitosterol     | 0.114 |
| SLC6A2   | □-sitosterol     | 0.114 |
| SLC6A4   | □-sitosterol     | 0.106 |
| BCHE     | □-sitosterol     | 0.106 |
| CHRM2    | □-sitosterol     | 0.106 |
| NR1I3    | □-sitosterol     | 0.106 |
| NR1H2    | □-sitosterol     | 0.106 |
| VDR      | □-sitosterol     | 0.106 |
| DHCR7    | □-sitosterol     | 0.106 |

|         |              |       |
|---------|--------------|-------|
| GLRA1   | □-sitosterol | 0.106 |
| FDFT1   | □-sitosterol | 0.106 |
| UGT2B7  | □-sitosterol | 0.106 |
| FOLH1   | Isobetanidin | 0.116 |
| NAALAD2 | Isobetanidin | 0.116 |
| NOX4    | Kaempferol   | 1.000 |
| XDH     | Kaempferol   | 1.000 |
| TYR     | Kaempferol   | 1.000 |
| FLT3    | Kaempferol   | 1.000 |
| AHR     | Kaempferol   | 1.000 |
| ESRRA   | Kaempferol   | 1.000 |
| GLO1    | Kaempferol   | 0.658 |
| SYK     | Kaempferol   | 0.658 |
| PTPRS   | Kaempferol   | 0.608 |
| ADORA2A | Kaempferol   | 0.567 |
| CDK5    | Kaempferol   | 0.518 |
| CDK1    | Kaempferol   | 0.518 |
| ARG1    | Kaempferol   | 0.518 |
| GPR35   | Kaempferol   | 0.502 |
| DAPK1   | Kaempferol   | 0.502 |
| MPG     | Kaempferol   | 0.502 |
| TTR     | Kaempferol   | 0.485 |
| CDK6    | Kaempferol   | 0.477 |
| CDK2    | Kaempferol   | 0.477 |
| CSNK2A1 | Kaempferol   | 0.427 |
| EGFR    | Kaempferol   | 0.403 |
| AVPR2   | Kaempferol   | 0.403 |
| F2      | Kaempferol   | 0.403 |
| AURKB   | Kaempferol   | 0.403 |
| DRD4    | Kaempferol   | 0.403 |
| MPO     | Kaempferol   | 0.403 |
| PIK3R1  | Kaempferol   | 0.403 |
| PYGL    | Kaempferol   | 0.403 |
| PTK2    | Kaempferol   | 0.403 |
| PLK1    | Kaempferol   | 0.403 |
| CDK1    | Kaempferol   | 0.403 |
| PKN1    | Kaempferol   | 0.403 |
| CA14    | Kaempferol   | 0.403 |
| NEK2    | Kaempferol   | 0.403 |
| CXCR1   | Kaempferol   | 0.403 |
| CAMK2B  | Kaempferol   | 0.403 |
| ALK     | Kaempferol   | 0.403 |
| AKT1    | Kaempferol   | 0.403 |
| NEK6    | Kaempferol   | 0.403 |
| AXL     | Kaempferol   | 0.403 |
| NUAK1   | Kaempferol   | 0.403 |
| AKR1C2  | Kaempferol   | 0.403 |
| AKR1C1  | Kaempferol   | 0.403 |
| AKR1C4  | Kaempferol   | 0.403 |

|        |            |       |
|--------|------------|-------|
| AKR1A1 | Kaempferol | 0.403 |
| CD38   | Kaempferol | 0.295 |
| CFTR   | Kaempferol | 0.271 |
| PFKFB3 | Kaempferol | 0.263 |
| AMY1A  | Kaempferol | 0.238 |
| GRK6   | Kaempferol | 0.238 |
| MAPT   | Kaempferol | 0.172 |
| PLG    | Luteolin   | 0.147 |
| KDM4E  | Luteolin   | 0.147 |
| TOP2A  | Quercetin  | 0.680 |
| INSR   | Quercetin  | 0.680 |
| PIK3CG | Quercetin  | 0.680 |
| APEX1  | Quercetin  | 0.680 |

---
